# Supplementary material for: Evaluation of the Synuclein-γ (SNCG) Gene as a PPARγ Target in Murine Adipocytes, Dorsal Root Ganglia Somatosensory Neurons, and Human Adipose Tissue
Source: PLoS One. 2015 Mar 10;10(3):e0115830. doi: 10.1371/journal.pone.0115830 (PMC4355072; doi:10.1371/journal.pone.0115830)
Supplement: S1 Data — (XLS) [file pone.0115830.s001.xls]

## Sheet: Figure 1
mRNA relative expression to control vehicle-treated cells				Blue italicized values considered outliers (Grubbs test)
log[Rosiglitazone], M	Rosiglitazone																Rosiglitazone + 10 uM antagonist
SNCG
zero	112.479	66.1984	92.6911	90.2335	117.46	128.912	58.9372	107.402	115.471	123.182	85.1173	114.627	86.2816	85.4872	115.52		123.412	83.2917	159.322	142.737	150.451	144.073	198.075	155.955
-8	48.4127	72.7204	53.5701	87.2916	88.4471	113.236	34.6758	79.6887									104.193	101.291	84.752	86.8874	68.1004	205.42380*	120.872	103.469
-7	37.5435	42.5604	34.4811		67.1188	71.9787	50.5686	125.20970*									84.7579	126.35	274.40740*	91.7789	119.237	62.7015	104.125	73.9077
-6	28.9781	22.041	23.9959	25.2803	15.9798	64.1637	15.3248	60.4273									60.7222	65.0135	95.9432		90.9636	76.1082	76.5342
LEP
zero	88.8758	74.9523	61.5666	87.2482	148.023	144.58	119.519	144.415	117.821	108.218	112.92	148.398	38.4817	66.7066	77.8947		73.7	22.8155	26.2834	118.675	109.907	146.512	147.807	125.505
-8	29.8327	68.259	35.3257	56.1785	72.5506	114.293	60.4787	92.6283									58.534	45.5189	40.7686	50.7385	96.2859	170.43	108.573	101.041
-7	23.1163	21.6269	17.3519		31.08	40.7241	29.3251	48.025									8.41822	23.9832	114.162100*	17.6754	52.3323	39.1708	49.2755	39.386
-6	7.92058	7.1747	11.392	7.61322	9.94796	18.0323	11.4115	18.6453									8.33204	8.31866	15.4007		22.2893	26.7718	20.5198
FABP4
zero	108.831	62.3269	97.8145	83.3355	88.6274	86.294	76.779	83.2928	110.09	112.615	105.453	119.534	136.27	128.737			33.1318	36.4959	61.3442	47.7443	89.0239	101.706	131.346	106.923
-8	88.1636	144.088	81.3438	149.178	128.082	180.462	102.098	173.735									38.9219	42.9419	42.309	44.0009	88.9977	179.003	92.0641	149.486
-7	183.177	242.23	250.546		241.844	256.056	190.188										32.2048	48.1475	90.8313	44.6763	226.752	140.139	235.496	128.422
-6	186.873	140.589	161.703	186.404	140.095	284.96	127.514										101.505	92.9705	133.317		261.914	224.777	221.548
log[LXR agonist(T0901317)], M	Sncg																Leptin																ap2/FABP4
zero	112.479	66.1984	92.6911	90.2335	117.46	128.912	58.9372	107.402	115.471	123.182	85.1173	114.627	86.2816	85.4872	115.52		88.8758	74.9523	61.5666	87.2482	148.023	144.58	119.519	144.415	117.821	108.218	112.92	148.398	42.8637	46.4079	54.1915		108.831	62.3269	97.8145	83.3355	76.654	74.6358	66.4063	72.04	110.09	112.615	105.453	119.534	117.86	111.345	181.059
-8	84.7912	82.4676	66.4918	77.4548	49.2635	119.749	73.4168	129.253									64.9392	67.5515	63.2792	62.8623	60.2011	83.1156	40.6736	81.3619									114.172	103.703	74.632	88.8166	51.8747	91.6968	106.492	111.563
-7	79.7183	65.3742	74.9804	78.3768	159.863	143.434	147.367	113.572									77.4746	67.86	62.2727	90.0349	78.2326	52.4254	63.6083	38.9937									98.8591	75.9507	104.635	125.491	102.023	121.579	100.89	110.903
-6	104.875	116.185	88.9467	57.543	85.0743	111.915	135.915	221.669000*									36.8275	44.2349	35.5102	26.5275	33.6992	29.9909	43.1739	78.985750*									114.79	105.801	98.5847	91.3497	87.8873	95.6845	118.168	139.995

## Sheet: Figure 3
Sears Human Adipose Tissue Gene Expression Data for SNCG and Leptin (Gene Chip results)
Probe Set ID	Gene	Description						Entrez ID
209877_at	SNCG	synuclein, gamma (breast cancer-specific protein 1)						6623
207092_at	LEP	leptin						3952
Study design as described in Sears, et al., PNAS 2009. PMID 19841271. Defined insulin resistance as Rd1 <8.0.
							SNCG				Leptin
	Study	Group	BMI	Rd 1	Rd 2	RdFrac	E - ADS	F - ADS	EF Frac		E - ADS	F - ADS	EF Frac
	Pio	Ob D	39.3777	2.33	5.24	1.24893	1695.9	780.2	-0.539949		27948.7	9140.6	-0.672951
	Pio	Ob D	50.8537	2.49	4.54	0.823293	2174	1830.1	-0.158188		22674.7	21311.4	-0.0601242
	Pio	Ob D	32.5514	2.41	2.69	0.116183	2358.3	1532.8	-0.35004		29046.2	28074.4	-0.033457
	Pio	D	27.3674	4.8	4.41	-0.08125	2219	1914.7	-0.137134		22452.9	26137.4	0.164099
	Pio	Ob D	43.5147	4.65	5.6	0.204301	2416.6	1497.4	-0.380369		50855	27117.5	-0.466768
	Pio	Ob D	32.6644	2.02615	7.39	2.64534	3021.9	2548.8	-0.156557		24216.4	23255.7	-0.0396715
	Pio	Ob D	36.6434	2.48754	6.27	1.52056	1682.6	1116.1	-0.336681		26200.1	19917.9	-0.239778
	Pio	D	29.0378	6.38515	7.53	0.179298	2513	1432.6	-0.429924		20715.8	18607.9	-0.101753
	Pio	O	44.4922	3.68	3.54	-0.0380435	2044.4	1812.1	-0.113627		24656.9	27234.2	0.104526
	Pio	O	38.8676	5.75	7.01	0.21913	1407.3	1508.1	0.0716265		25274.3	20312.3	-0.196326
	Pio	O	36.6049	5.59	6.53	0.168157	nd	1397.2	na		nd	25150	na
	Pio	O	33.9815	4.53	6.43	0.419426	2178.7	689.3	-0.683619		21058.6	16641.6	-0.209748
	Pio	O	32.5716	4.56	6.55	0.436404	1657.5	951.3	-0.426063		25484.6	20365.3	-0.200878
	Pio	O	40.8574	7.48	6.76	-0.0958116	2111.3	1382.7	-0.345095		28909.9	22254.1	-0.230226
	Pio	O	29.9501	3.67	5.92	0.612763	664.2	775.4	0.167419		21124.6	18903.3	-0.105152
	Pio	O	31.6084	7.22	6.94	-0.0387812	1202.8	2078.9	0.728384		23163.4	23217.3	0.00232696
	Pio	L	23.2294	12.7	11.87	-0.0653543	919.3	910.1	-0.0100076		14666	16339.7	0.114121
	Pio	L	23.1038	9.07	9.61	0.059104	2660.8	1906.8	-0.283373		31706.1	29935.8	-0.0558346
	Pio	L	23.7716	9.25472	9.42	0.0179772	674.4	846.5	0.25519		15527.3	9288.9	-0.40177
	Pio	L	24.341	8.97607	9	0.00266593	nd	953.1	na		nd	21743.7	na
	Pio	L	24.4628	12.5293	10.94	-0.126865	285.7	296.7	0.0385019		1257.7	715.4	-0.431184
	Pio	L	21.0668	10.9481	11.06	0.0102214	nd	329.9	na		nd	2457.5	na
	Pio	L	24.9307	9.7147	8.19	-0.157117	1519.8	693.8	-0.543493		21033.5	23331.9	0.109273
	Pio	O	37.7569	2.9404	5.89	1.00344	1225.8	1520	0.240006		22855	19803.4	-0.13352
	Pio	L	19.7133	14.3797	12.23	-0.149168	658.4	786.6	0.194714		5359	7907.7	0.475592
	Key
	ADS - average difference score; expression value calculated using Affy's MAS5.0
	E - adipose tissue, pre-TZD
	F - adipose tissue, post-TZD
	Rd - rate of glucose disposal during hyperinsulinemic euglycemic clamps study. Greater the Rd, greater the insulin senstivity.
	RdFrac - Fractional change in Rd after TZD; (Rd2-Rd1)/Rd1
	EF Frac - Fractional change in expression after TZD; (F-E)/E
	nd - not determined
	na - not applicable
	D - type 2 diabetic
	Ob D - obese type 2 diabetic
	L - non-diabetic, lean
	O - non-diabetic obese

## Sheet: Figure 4
Human Adipose Tissue Gene Expression Data for SNCG and Leptin (Gene Chip results)
	Data from
		control gene:		PPIB
		relative to:		106	PIOA
		Outlier removal setting:		2
		Value if undetectable:		N/A
		18S CT spread allowed		4
		For gene:		18s
		From Minimum or Average:		min
			Pre-treatment			Post-treatment
			Sncg	Leptin			Sncg	Leptin
		PIOA1	47.1435	35.9235		PIOB1	55.7864	66.1185
		PIOA2	122.486	114.755		PIOB2	149.304	131.491
		PIOA3	75.7586	83.5483		PIOB3	115.575	89.6475
		PIOA4	109.637	160.982		PIOB4	50.4665	43.5935
		PIOA5	177.534	173.801		PIOB5	122.789	136.765
		PIOA6	147.178	107.319		PIOB6	106.58	80.3553
		PIOA7	114.483	96.4764		PIOB7	122.271	121.744
		PIOA9	149.613	136.547		PIOB9	90.837	68.991
		PIOA10	82.7022	136.197		PIOB10	118.106	156.103
		PIOA11	55.892	86.4583		PIOB11	46.9546	79.1033
		PIOA12	143.31	110.905		PIOB12	103.58	53.9723
		PIOA13	87.572	105.511		PIOB13	85.5494	106.092
		PIOA14	75.4174	39.8777		PIOB14	82.5611	78.6223
		PIOA15	51.2769	52.6023		PIOB15	33.4855	59.0432
		PIOA16	59.9964	59.0969		PIOB16	39.4879	47.1283
average percent mRNA expression, relative to Pre:			100	100			88.2222	87.918

## Sheet: Figure 5
	Mouse Dorsal Root Ganglia Cells, Gene Expression Data for Sncg
	Percent of Control, relative mRNA expression level
	Control	100nM Rosi
	78.4	173.11
	116.42	199.32
	90.94	132.32
	114.23	198.11
	77.96	125.04
	84.81	81.39
	165.49	60.67
	52.16	71.55
	157.98	77.04
	61.61	163.8
	83.01	187.21
	166.83	58.43
	72.63	134.47
	77.53	58.52
	50.6928	251.377
	47.833	69.2071
	201.474	43.9051
Average:	100	122.675
